# Supplementary material
Source: PubMed Central journal article supplement (PMC4845097)
Supplement: NIHMS745133-supplement-2.pdf [file NIHMS745133-supplement-2.pdf]

**Cell Reports**

**Supplemental Information**

**Deregulation of STING Signaling in Colorectal  
Carcinoma Constrains DNA-Damage  
Responses and Correlates With Tumorigenesis**

**Tianli Xia, Hiroyasu Konno, Jeonghyun Ahn and Glen N. Barber**

# Supplemental Figures

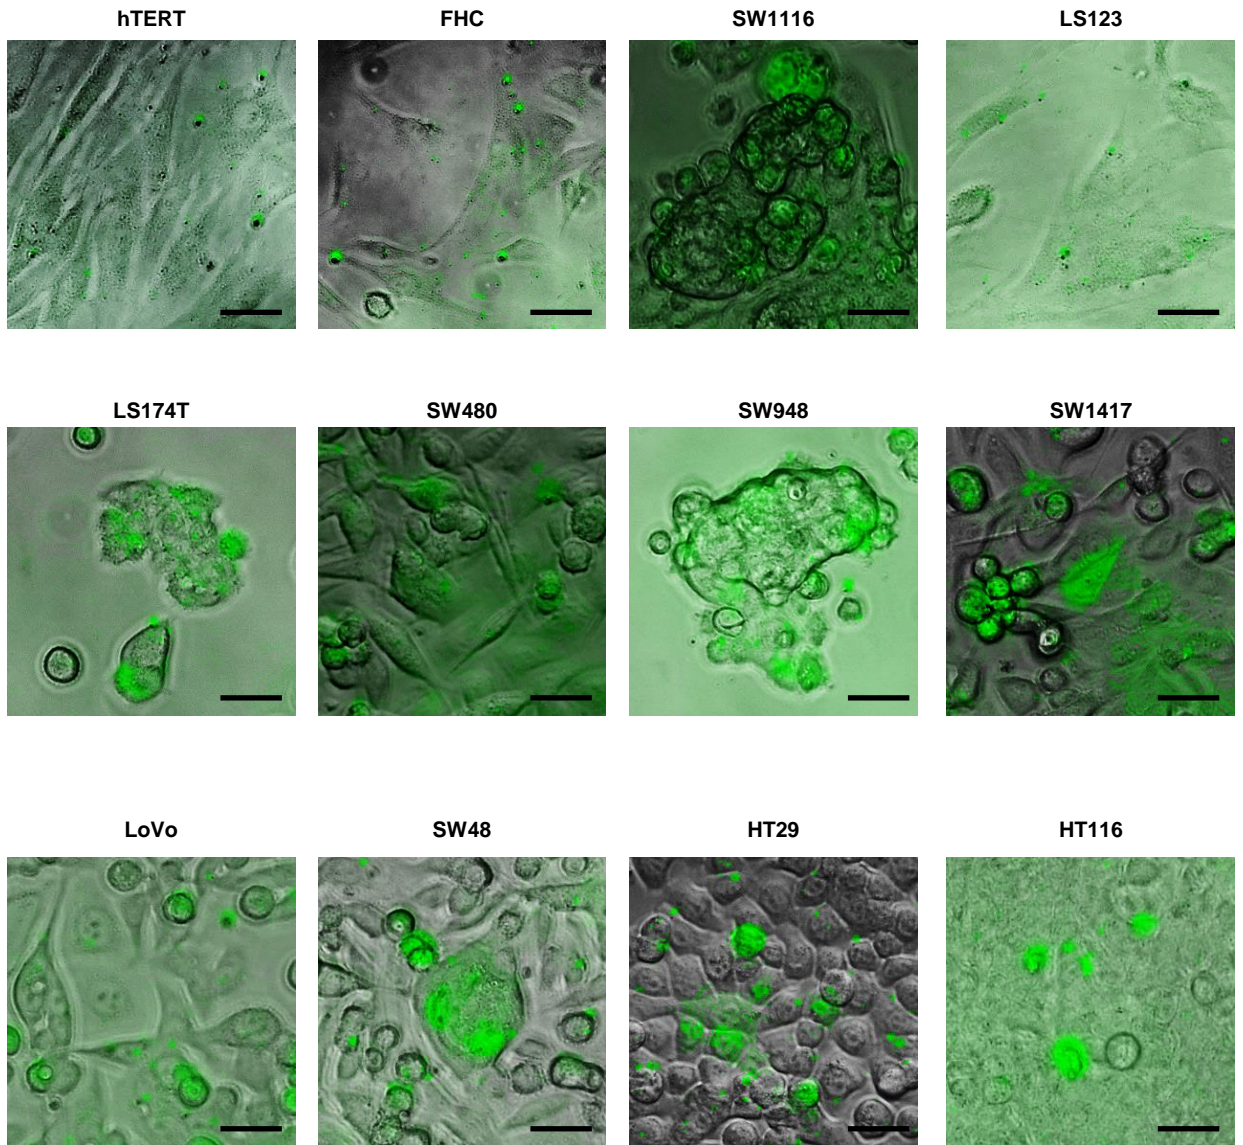

**Figure S1, Related to Figure 1.** dsDNA90 Transfection efficiency into Colon Cancer Cell Lines were monitor with FITC-dsDNA90 3 hours post Lipofectamine 2000 transfection under fluorescent microscopy. Images shown are at 600X. Bar size, 5μm.

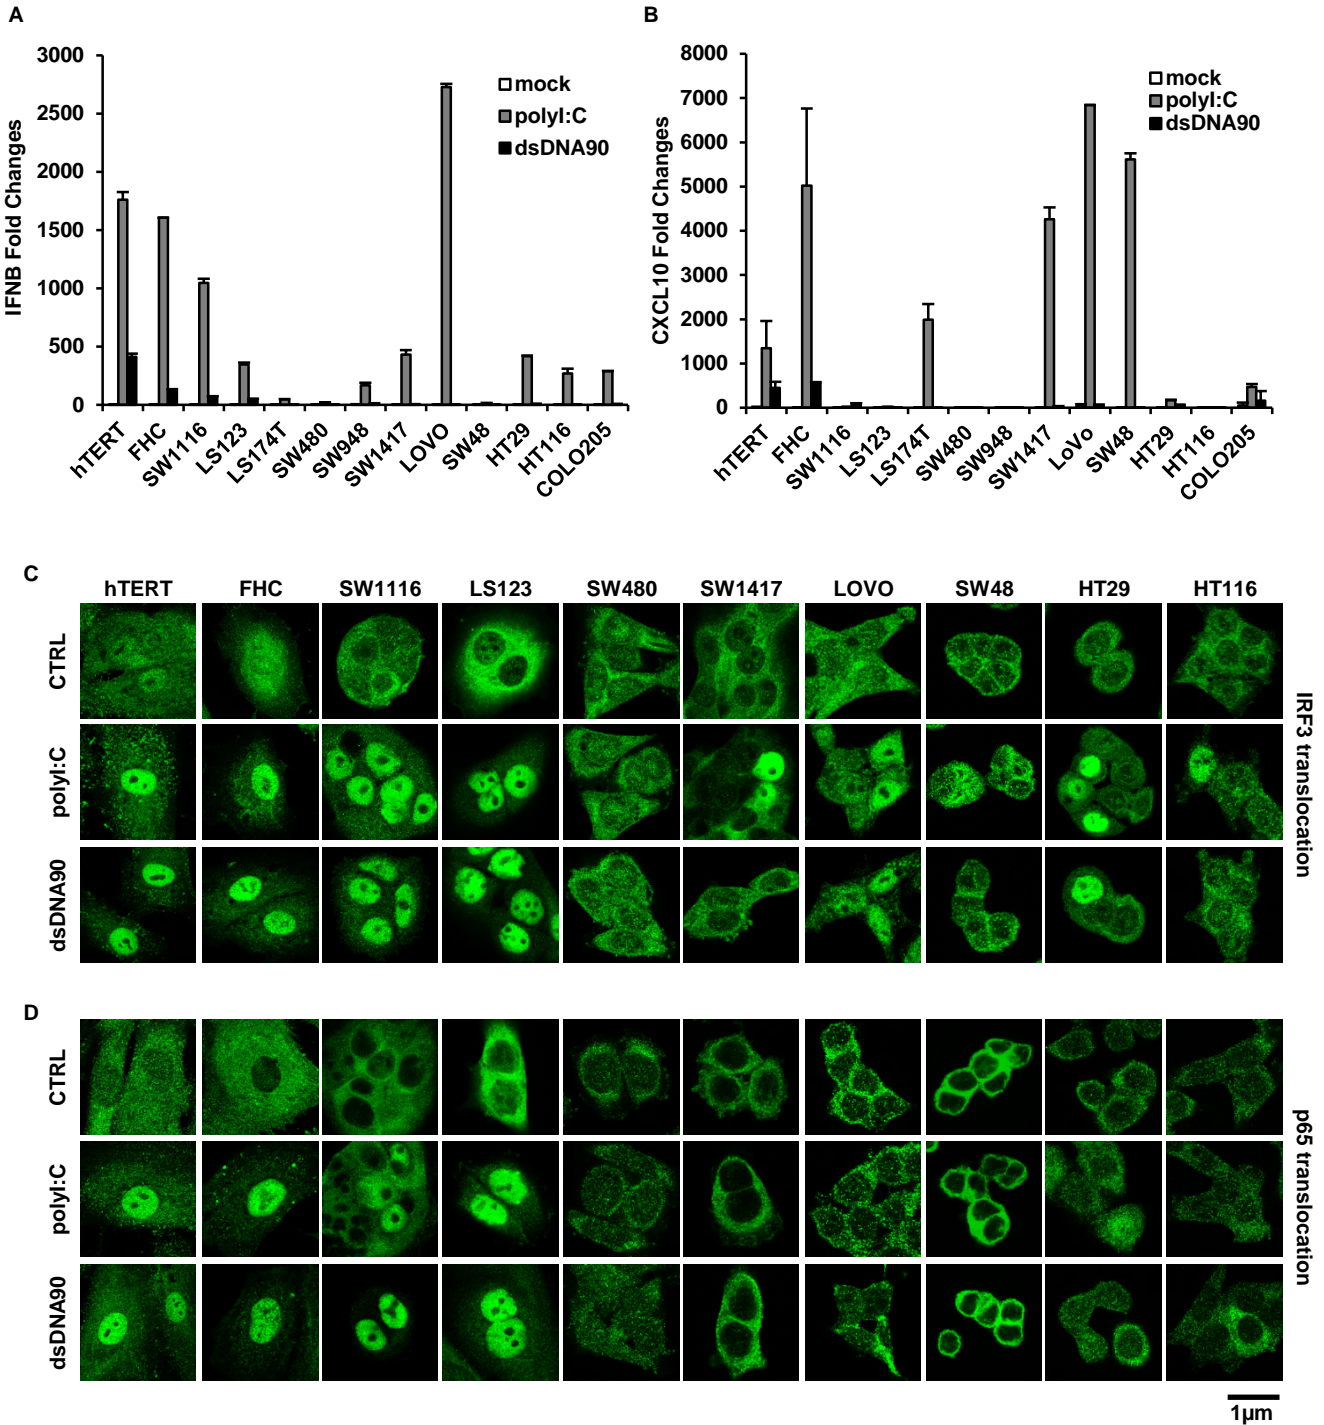

**Figure S2, Related to Figure 1 and 2.** Normal and colon cancer cells were transfected with 3μg/ml polyI:C or dsDNA90 or mock transfected for 3 hour followed by qPCR analysis of human IFNβ (A) and CXCL10 (B) expression. Data is representative of at least two independent experiments. Cells similarly treated as A were subjected to Immunofluorescence Microscopy analysis of IRF3 translocation (C) and p65 translocation (D). Representative images are shown at original magnification, 1260X. Bar size, 1μm.

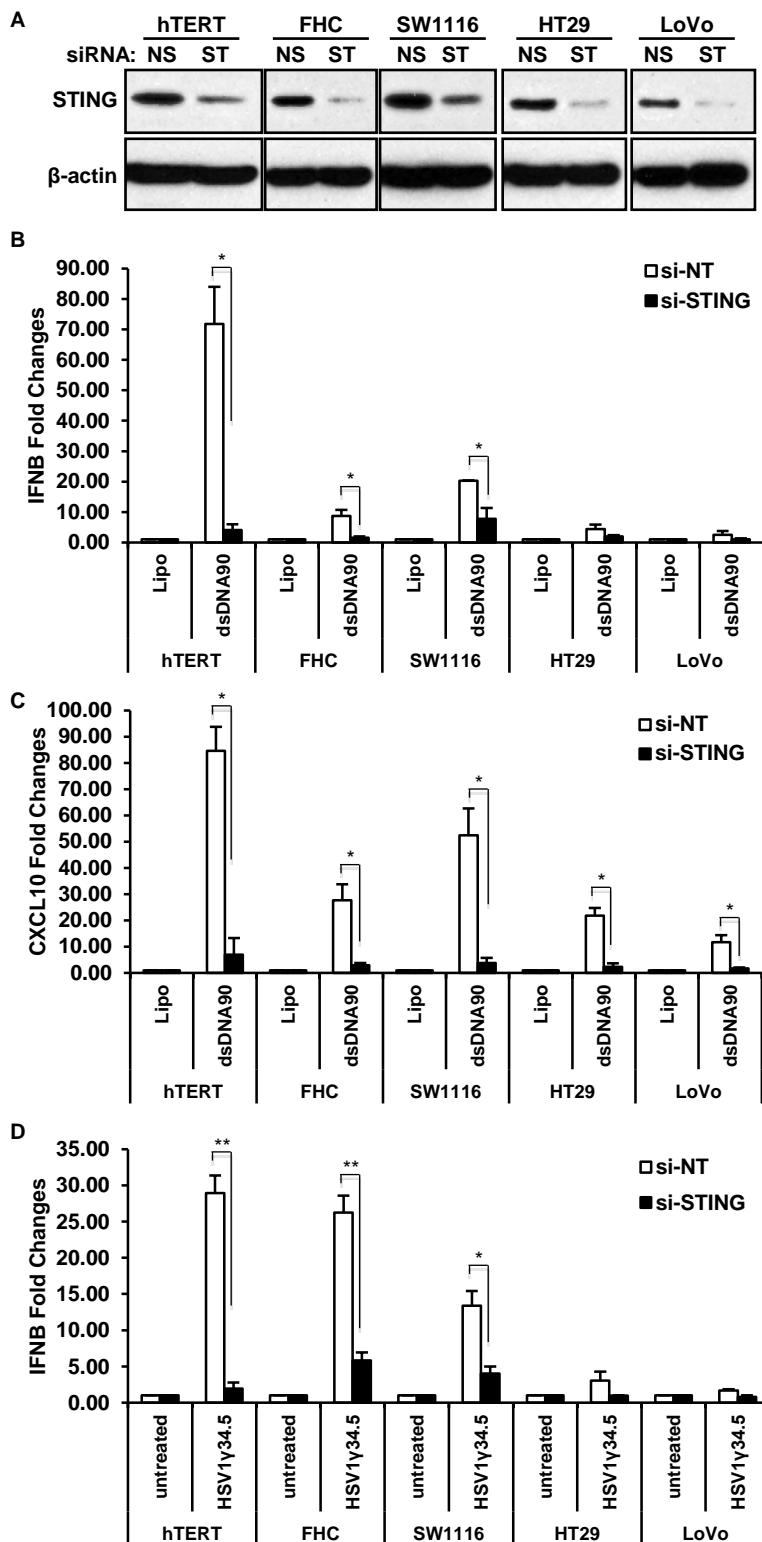

**Figure S3, Related to Figure 1 and 4.** (A) Normal and colon cancer cells were treated with non-specific siRNA (si-NT) or STING siRNA (si-STING) for 3 days. Cells were then analyzed for STING siRNA efficiency by immunoblot. (B) siRNA treated Cells same as A were transfected with dsDNA90 at 3 $\mu$ g/ml for 3 hours followed by qPCR analysis for IFN $\beta$  expression. (C) qPCR analysis for CXCL10 expression in cells same as B. (D) siRNA treated Cells same as A were infected with HSV $\gamma$ 34.5 at M.O. I. 5 for 3 hours. Cells were then analyzed by qPCR for IFN $\beta$  expression. Data is representative of at least two independent experiments. Error bars indicate s.d. \*,  $p < 0.05$ ; \*\*,  $p < 0.01$ ; Student's t-test.

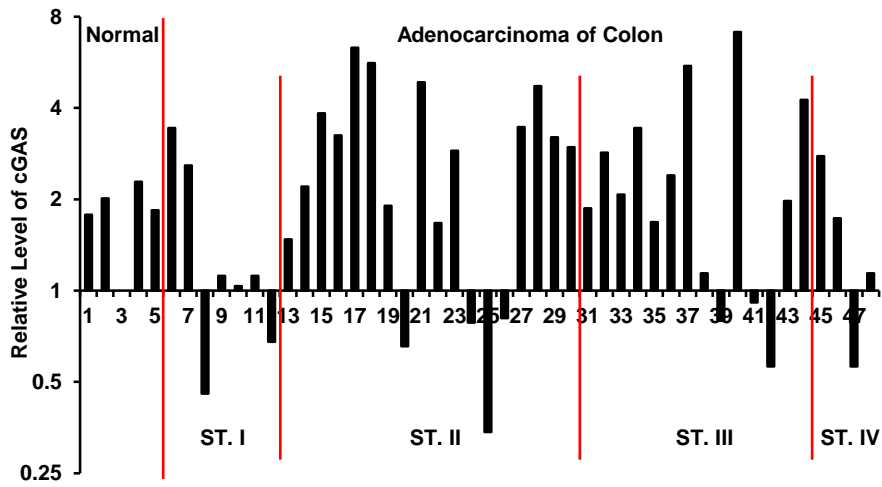

**Figure S4, Related to Figure 3.** cDNA from 5 normal human colon tissues and 43 human colon cancers of various stages were analyzed by qPCR for cGAS expression.

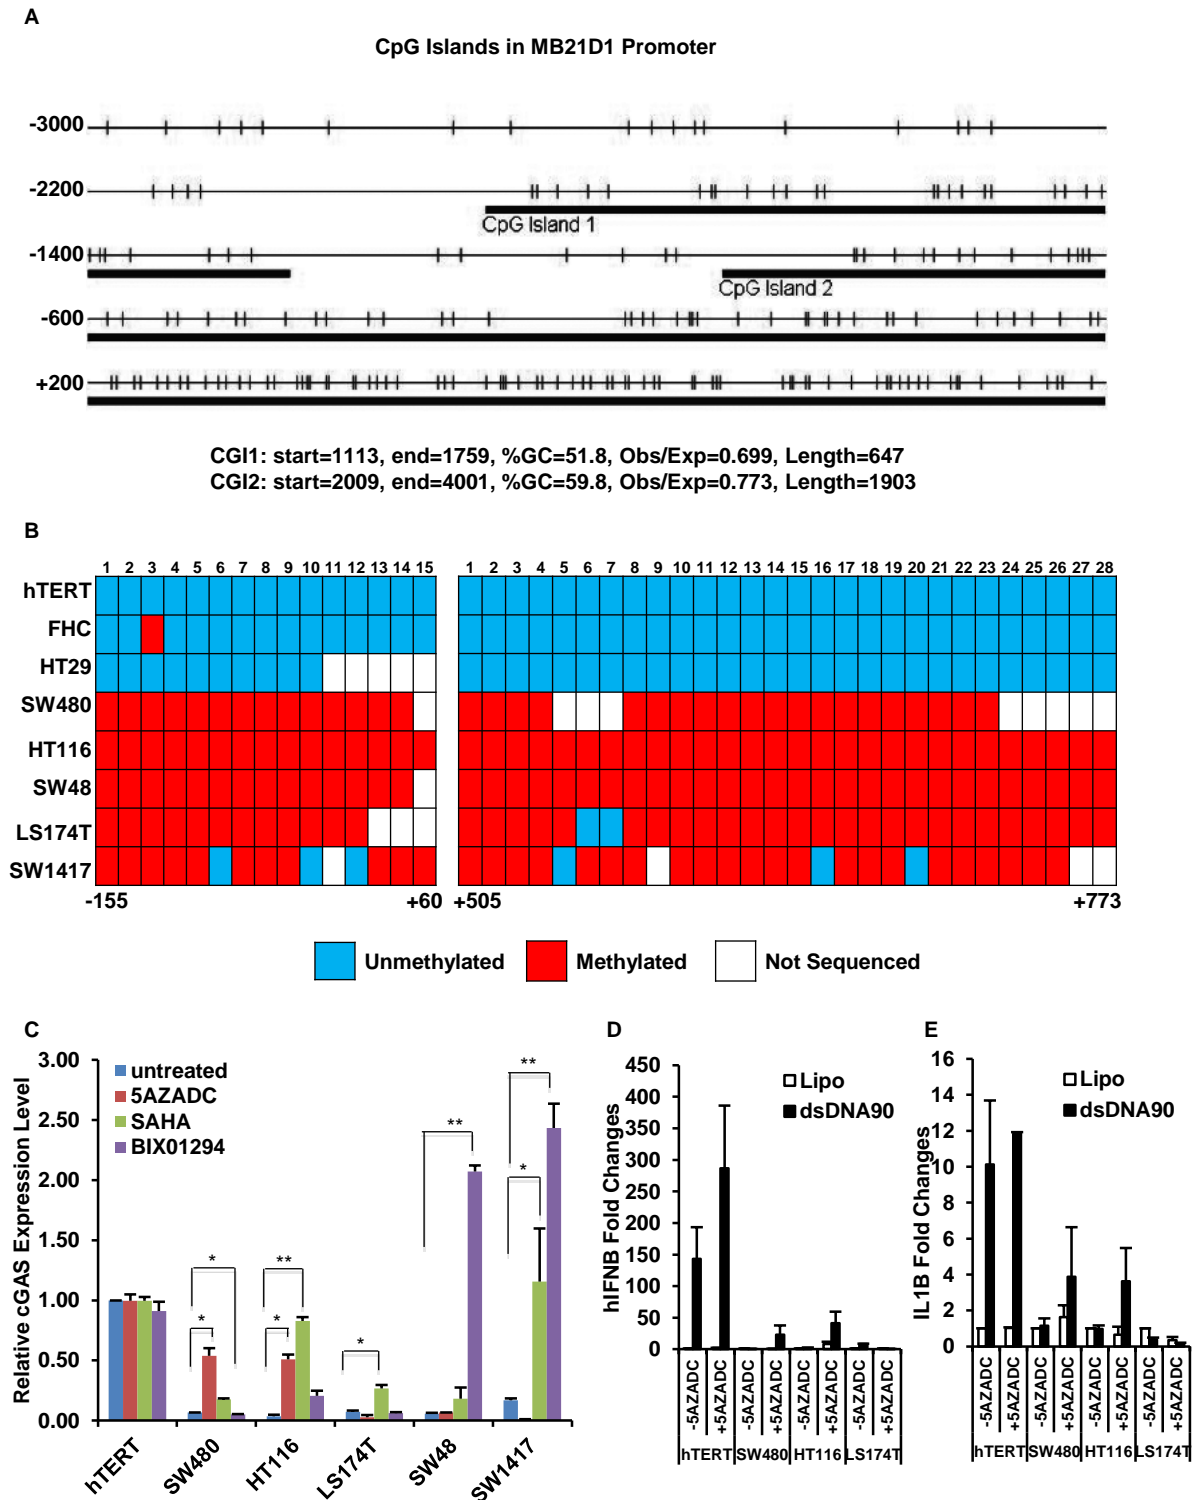

**Figure S5, Related to Figure 3.** (A) Schematic representation of CpG Islands located in the proximal promoter regions of cGAS. (B) Bisulfite sequencing analysis of cGAS promoter region. Each box represents one CpG dinucleotide located within the promoter region indicated by the position marker at the bottom. Red represents methylated CpG; Blue represents unmethylated CpG; White, not sequenced). (C) Colon cancer cells were treated with 5AZADC (DNA methyltransferase inhibitor), SAHA (histone deacetylase inhibitor) and BIX01294 (histone-lysine methyltransferase inhibitor) at 1 $\mu$ M for 5 days. cGAS expression was then examined by qPCR. (D) IFN $\beta$  qPCR analysis of cells (same as in Figure 3C) treated with 5AZADC followed by dsDNA transfection at 3 $\mu$ g/ml dsDNA90 for 3 hours. (E) IL1 $\beta$  qPCR analysis of cells same as D. Data is representative of at least two independent experiments. Error bars indicate s.d. \*, p<0.05; \*\*, p<0.01; Student's t-test.

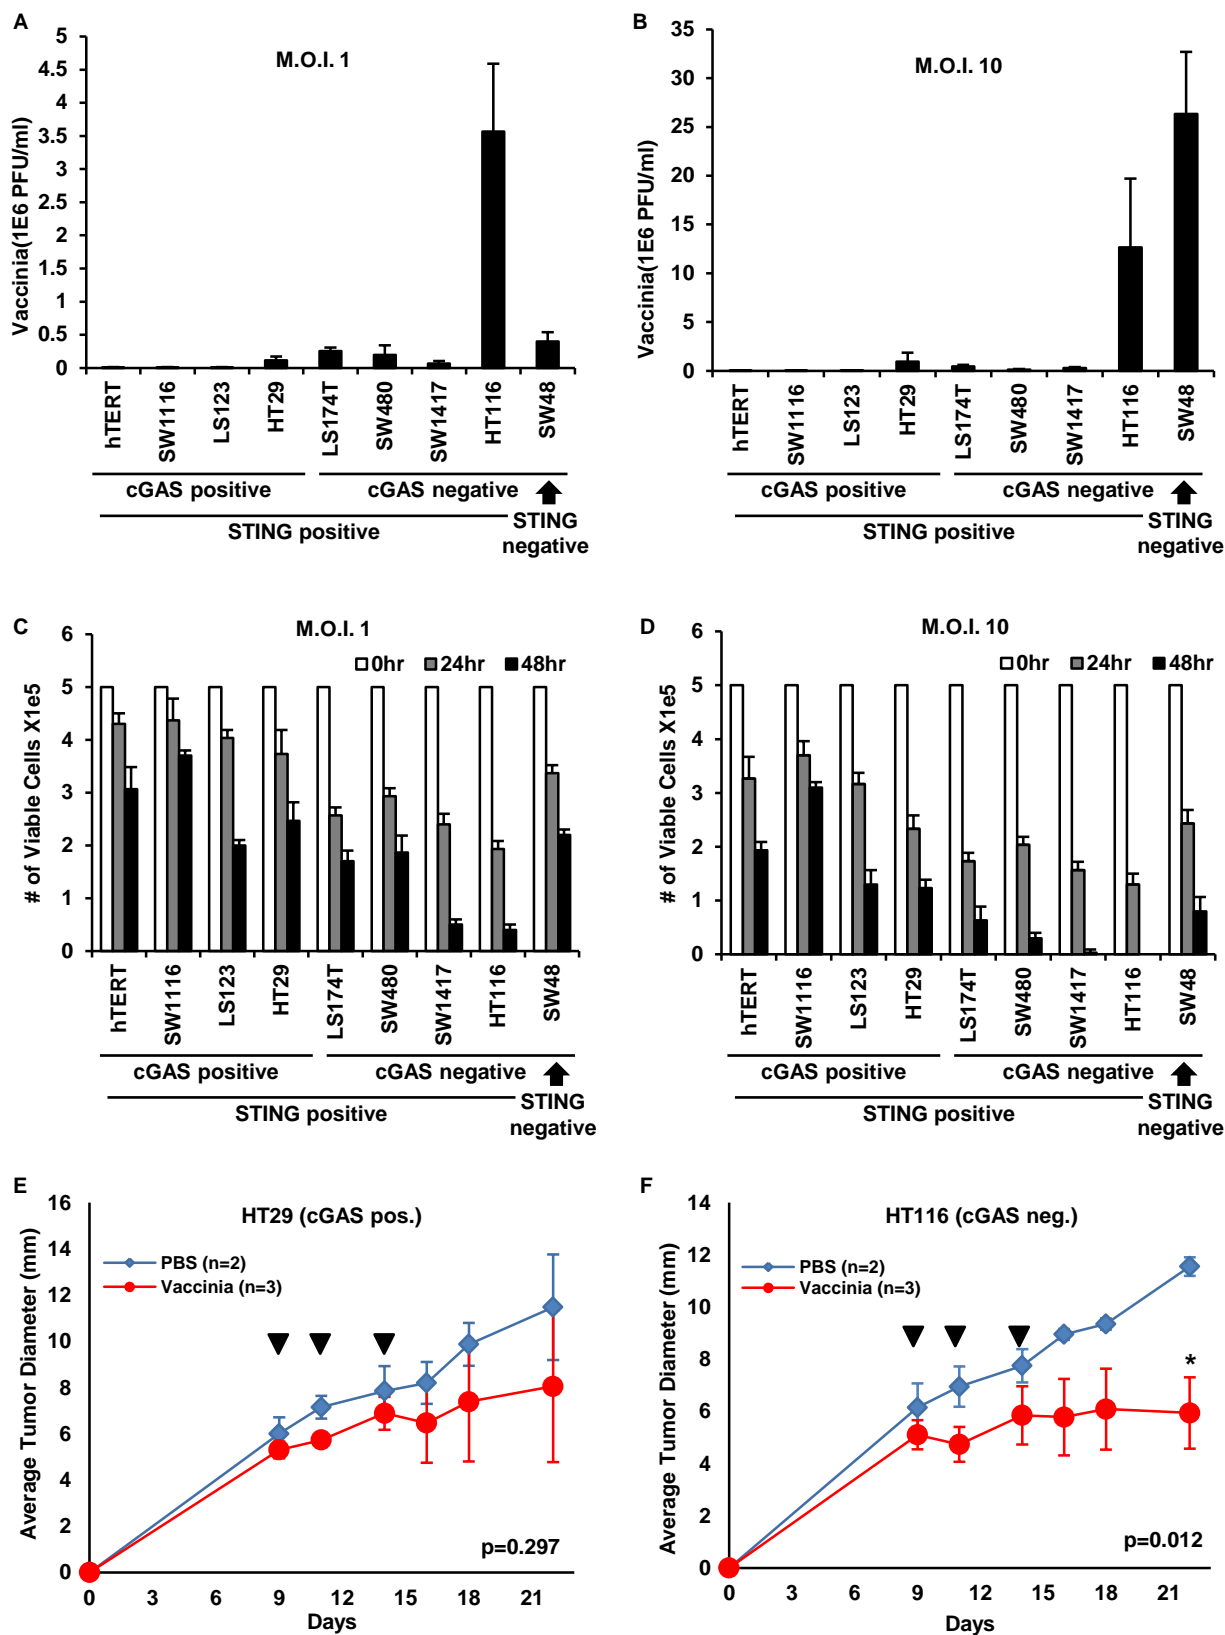

**Figure S6, Related to Figure 4 and 7.** Normal and Colon Cancer Cells were infected with Vaccinia Virus at M.O.I. 1 (A) or M.O.I. 10 (B) for 24 hours, and viral replication was analyzed by standard plaque assay in Vero cells. Cells were infected with Vaccinia Virus at M.O.I. 1 (C) or M.O.I. 10 (D), and cell viability was analyzed by trypan blue staining 24 hours and 48 hours later. Colon Cancer Cell HT29 (E) or HT116 (F) xenograft tumors were generated in the right flank of nude Balb/c mice. When tumors had reached approximately 0.5 cm in diameter, tumors were injected every other day a total of three times (arrows) with 1E7 PFU Vaccinia Virus in 50  $\mu$ l PBS (N=3) or 50  $\mu$ l PBS only (N=2) and tumor growth measured every other day. Statistical analysis was carried out comparing the two treatment groups at the last time point using the unpaired Student's t-test. P values are as indicated.

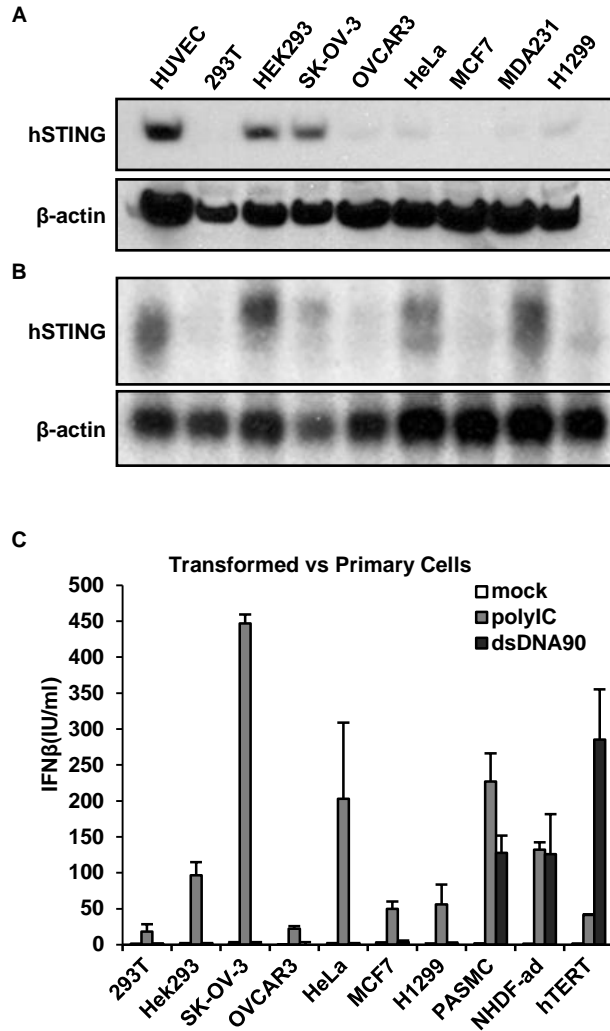

**Figure S7, Related to Figure 6.** STING expression and dsDNA induced Interferon  $\beta$  production in human cancer cell lines. (A) Immunoblot of STING in various transformed or cancer derived human cell lines (as indicated in the top row). Normal HUVEC cells was used as positive control. (B) Northern blot analysis of STING mRNA expression in cell lines same as A. HUVEC was used as positive control. (C), ELISA analysis of Interferon  $\beta$  production in the media of cells (same as A) transfected with 3 $\mu$ g/ml polyIC or dsDNA90 or mock transfected for 16 hours. Normal human cells (PAsMC, NHDF-ad and hTERT) were included as positive controls. Data is representative of at least two independent experiments. Error bars indicate s.d.



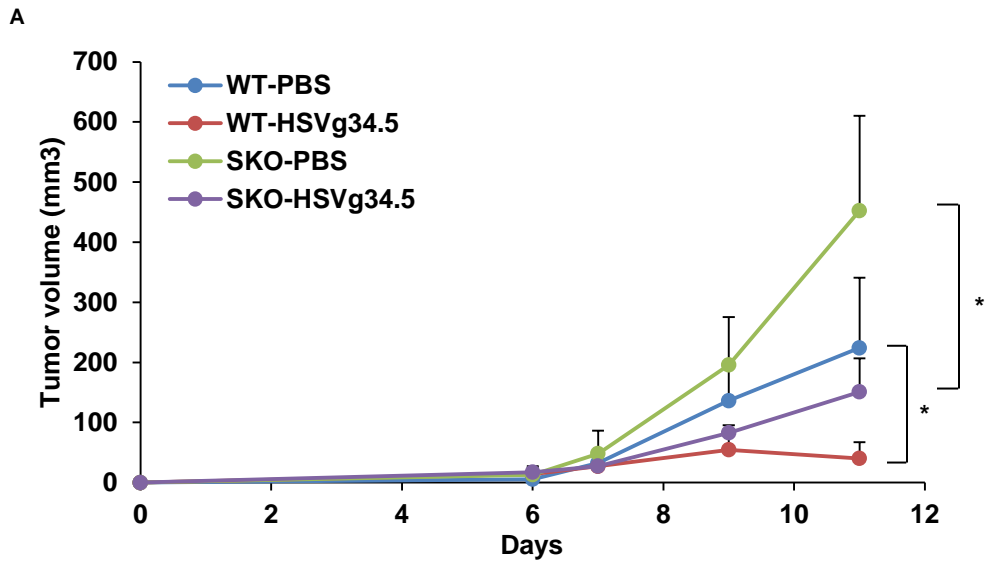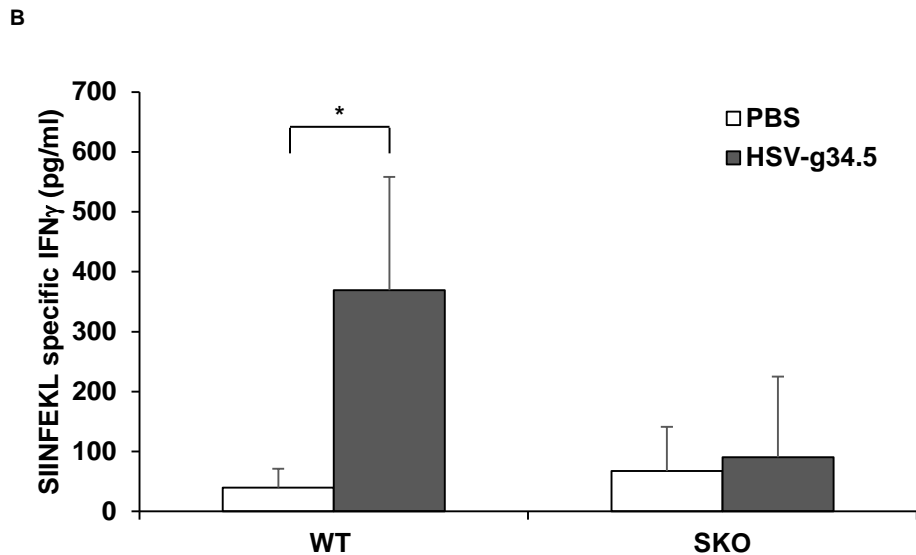

**Figure S8, Related to Figure 7.** (A) B16-OVA cells ( $5 \times 10^5$ /mouse) were subcutaneously injected into C57/BL6 WT and Sting knockout (SKO) mice on day 0. On days 7, 9, 11, mice were injected intratumorally with HSV1 $\gamma$ 34.5 ( $5 \times 10^5$  PFU/mouse) and tumor volume was monitored every other day. (B) ELISA of IFN $\gamma$  in  $1 \times 10^6$  splenocytes from mice same as A and stimulated with SIINFEKL peptides for 48 hours. Data presented is the mean SD of 4 to 6 mice. Error bars indicate s.d.; \*,  $p < 0.05$ ; Student's t-test.

**Table S1, Related to Figure 1. Sequencing of STING in Colon Cancer Cell Lines**

| Sample Name | Age    | Gender | Ethnicity | Colon Cancer Grade        | Target Region     | Position in Target | Ref. Base | Variant Found | Variant Name | Variant Class | Variant Function   | Reference Codon | Variant Codon |
|-------------|--------|--------|-----------|---------------------------|-------------------|--------------------|-----------|---------------|--------------|---------------|--------------------|-----------------|---------------|
| FHC         | normal |        |           |                           | TMEM173 Exon3     | 144                | G         | S             | rs7447927    | SNP           | Coding, Synon.     | GTG=Val         | GTC=Val       |
|             |        |        |           |                           | TMEM173 Exon6     | 175                | A         | G             | rs1131769    | SNP           | Coding, Non-Synon. | CAT=His         | CGT=Arg       |
| SW1116      | 73     | male   | Caucasian | Dukes' type A, grade III  | TMEM173 Exon3     | 144                | G         | C             | rs7447927    | SNP           | Coding, Synon.     | GTG=Val         | GTC=Val       |
|             |        |        |           |                           | TMEM173 Exon6     | 175                | A         | G             | rs1131769    | SNP           | Coding, Non-Synon. | CAT=His         | CGT=Arg       |
| LS123       | 65     | female | Caucasian | Dukes' type B             | TMEM173 Exon3     | 144                | G         | C             | rs7447927    | SNP           | Coding, Synon.     | GTG=Val         | GTC=Val       |
|             |        |        |           |                           | TMEM173 Exon6     | 175                | A         | G             | rs1131769    | SNP           | Coding, Non-Synon. | CAT=His         | CGT=Arg       |
| LS174T      | 58     | female | Caucasian | Dukes' type B             | TMEM173 Intron1   | 16                 | C         | T             | rs80059114   | SNP           | UTR                |                 |               |
|             |        |        |           |                           | TMEM173 Exon3     | 144                | G         | C             | rs7447927    | SNP           | Coding, Synon.     | GTG=Val         | GTC=Val       |
|             |        |        |           |                           | TMEM173 Exon6     | 175                | A         | G             | rs1131769    | SNP           | Coding, Non-Synon. | CAT=His         | CGT=Arg       |
|             |        |        |           |                           | TMEM173 Exon3     | 144                | G         | S             | rs7447927    | SNP           | Coding, Synon.     | GTG=Val         | GTC=Val       |
| SW480       | 50     | male   | Caucasian | Dukes' type B             | TMEM173 Exon3     | 212                | G         | R             | rs11554776   | SNP           | Coding, Non-Synon. | CGC=Arg         | CAC=His       |
|             |        |        |           |                           | TMEM173 Intron4   | 140                | G         | R             | rs7380272    | SNP           | Intronic           |                 |               |
|             |        |        |           |                           | TMEM173 Exon6     | 169                | G         | S             | rs78233829   | SNP           | Coding, Non-Synon. | GGT=Gly         | GCT=Ala       |
|             |        |        |           |                           | TMEM173 Exon6     | 175                | A         | G             | rs1131769    | SNP           | Coding, Non-Synon. | CAT=His         | CGT=Arg       |
|             |        |        |           |                           | TMEM173 Intron6_3 | 3                  | A         | R             | rs75746446   | SNP           | Intronic           |                 |               |
|             |        |        |           |                           | TMEM173 Exon7     | 119                | G         | R             | rs7380824    | SNP           | Coding, Non-Synon. | CGG=Arg         | CAG=Gln       |
|             |        |        |           |                           | TMEM173 Intron7_2 | 52                 | G         | S             | rs73257329   | SNP           | Intronic           |                 |               |
|             |        |        |           |                           | TMEM173 Intron1   | 16                 | C         | Y             | rs80059114   | SNP           | UTR                |                 |               |
| SW948       | 81     | female | Caucasian | Dukes' type C, grade III  | TMEM173 Exon3     | 144                | G         | S             | rs7447927    | SNP           | Coding, Synon.     | GTG=Val         | GTC=Val       |
|             |        |        |           |                           | TMEM173 Exon6     | 175                | A         | R             | rs1131769    | SNP           | Coding, Non-Synon. | CAT=His         | CGT=Arg       |
|             |        |        |           |                           | TMEM173 Exon3     | 144                | G         | S             | rs7447927    | SNP           | Coding, Synon.     | GTG=Val         | GTC=Val       |
| SW1417      | 53     | female | Caucasian | Dukes' type C, grade III  | TMEM173 Exon3     | 144                | G         | R             | rs1131769    | SNP           | Coding, Non-Synon. | CAT=His         | CGT=Arg       |
|             |        |        |           |                           | TMEM173 Exon6     | 175                | A         | R             | rs7447927    | SNP           | Coding, Synon.     | GTG=Val         | GTC=Val       |
| LOVO        | 56     | male   |           | Dukes' type C, grade IV   | TMEM173 Exon3     | 144                | G         | S             | rs7447927    | SNP           | Coding, Synon.     | GTG=Val         | GTC=Val       |
|             |        |        |           |                           | TMEM173 Exon3     | 212                | G         | R             | rs11554776   | SNP           | Coding, Non-Synon. | CGC=Arg         | CAC=His       |
|             |        |        |           |                           | TMEM173 Intron4   | 140                | G         | R             | rs7380272    | SNP           | Intronic           |                 |               |
|             |        |        |           |                           | TMEM173 Exon6     | 169                | G         | S             | rs78233829   | SNP           | Coding, Non-Synon. | GGT=Gly         | GCT=Ala       |
|             |        |        |           |                           | TMEM173 Exon6     | 175                | A         | G             | rs1131769    | SNP           | Coding, Non-Synon. | CAT=His         | CGT=Arg       |
|             |        |        |           |                           | TMEM173 Intron6_3 | 3                  | A         | R             | rs75746446   | SNP           | Intronic           |                 |               |
|             |        |        |           |                           | TMEM173 Exon7     | 119                | G         | R             | rs7380824    | SNP           | Coding, Non-Synon. | CGG=Arg         | CAG=Gln       |
|             |        |        |           |                           | TMEM173 Intron7_2 | 52                 | G         | S             | rs73257329   | SNP           | Intronic           |                 |               |
| SW48        | 82     | female | Caucasian | Dukes' type C, grade IV   | TMEM173 Intron1   | 16                 | C         | Y             | rs80059114   | SNP           | UTR                |                 |               |
|             |        |        |           |                           | TMEM173 Exon3     | 144                | G         | C             | rs7447927    | SNP           | Coding, Synon.     | GTG=Val         | GTC=Val       |
|             |        |        |           |                           | TMEM173 Exon3     | 226                | A         | R             | Novel        | SNP           | Coding, Non-Synon. | AG=Arg          | GG=His        |
|             |        |        |           |                           | TMEM173 Exon6     | 175                | A         | G             | rs1131769    | SNP           | Coding, Non-Synon. | CAT=His         | CGT=Arg       |
| HT29        | 44     | female | Caucasian | colorectal adenocarcinoma | TMEM173 Exon3     | 144                | G         | C             | rs7447927    | SNP           | Coding, Synon.     | GTG=Val         | GTC=Val       |
|             |        |        |           |                           | TMEM173 Exon6     | 175                | A         | G             | rs1131769    | SNP           | Coding, Non-Synon. | CAT=His         | CGT=Arg       |
| HT116       | adult  | male   |           | colorectal carcinoma      | TMEM173 Exon3     | 144                | G         | C             | rs7447927    | SNP           | Coding, Synon.     | GTG=Val         | GTC=Val       |
|             |        |        |           |                           | TMEM173 Exon6     | 175                | A         | G             | rs1131769    | SNP           | Coding, Non-Synon. | CAT=His         | CGT=Arg       |
| Colo205     | 70     | male   | Caucasian | Dukes' type D             | TMEM173 Exon3     | 144                | G         | S             | rs7447927    | SNP           | Coding, Synon.     | GTG=Val         | GTC=Val       |
|             |        |        |           |                           | TMEM173 Exon6     | 175                | A         | R             | rs1131769    | SNP           | Coding, Non-Synon. | CAT=His         | CGT=Arg       |

Table S2, Related to Figure 3. Sequencing of cGAS in Colon Cancer Cell Lines

| Sample Name | Age   | Gender | Ethnicity | Colon Cancer Grade        | Target Region  | Position in Target | Ref. Base | Variant Found | Variant Name | Variant Class | Variant Function   | Reference Codon | Variant Codon |
|-------------|-------|--------|-----------|---------------------------|----------------|--------------------|-----------|---------------|--------------|---------------|--------------------|-----------------|---------------|
| FHC         |       |        |           | normal                    | MB21D1_Exon5_2 | 70                 | G         | A             | rs311678     | SNP           | Coding, Synon.     | AAG=Lys         | AAA=Lys       |
|             |       |        |           |                           | MB21D1_Exon1_1 | 243                | C         | A             | rs9352000    | SNP           | Coding, Non-Synon. | ACC=Thr         | AAC=Asn       |
|             |       |        |           |                           | MB21D1_Exon1_3 | 11                 | T         | C             | rs9446904    | SNP           | Coding, Synon.     | CCT=Pro         | CCC=Pro       |
|             |       |        |           |                           | MB21D1_Exon2   | 125                | C         | M             | rs610913     | SNP           | Coding, Non-Synon. | CCT=Pro         | CAT=His       |
| SW1116      | 73    | male   | Caucasian | Dukes' type A, grade III  | MB21D1_Exon1_1 | 243                | C         | A             | rs73754628   | SNP           | Coding, Synon.     | ATC=Ile         | ATT=Ile       |
|             |       |        |           |                           | MB21D1_Exon1_3 | 11                 | T         | C             | rs9446904    | SNP           | Coding, Non-Synon. | ACC=Thr         | AAC=Asn       |
|             |       |        |           |                           | MB21D1_Exon2   | 125                | C         | A             | rs610913     | SNP           | Coding, Synon.     | CCT=Pro         | CCC=Pro       |
|             |       |        |           |                           | MB21D1_Exon5_2 | 70                 | G         | A             | rs311678     | SNP           | Coding, Non-Synon. | CCT=Pro         | CAT=His       |
| LS123       | 65    | female | Caucasian | Dukes' type B             | MB21D1_Exon1_1 | 243                | C         | A             | rs9352000    | SNP           | Coding, Synon.     | AAG=Lys         | AAA=Lys       |
|             |       |        |           |                           | MB21D1_Exon1_2 | 11                 | C         | M             | rs35629782   | SNP           | Coding, Non-Synon. | ACC=Thr         | AAC=Asn       |
|             |       |        |           |                           | MB21D1_Exon1_3 | 11                 | T         | C             | rs9446904    | SNP           | Coding, Non-Synon. | GCG=Ala         | GAG=Glu       |
|             |       |        |           |                           | MB21D1_Exon2   | 125                | C         | A             | rs610913     | SNP           | Coding, Synon.     | CCT=Pro         | CCC=Pro       |
| LS174T      | 58    | female | Caucasian | Dukes' type B             | MB21D1_Exon5_2 | 70                 | G         | R             | rs311678     | SNP           | Coding, Non-Synon. | CCT=Pro         | CAT=His       |
|             |       |        |           |                           | MB21D1_Exon1_1 | 243                | C         | A             | rs9352000    | SNP           | Coding, Synon.     | AAG=Lys         | AAA=Lys       |
|             |       |        |           |                           | MB21D1_Exon1_3 | 11                 | T         | C             | rs9446904    | SNP           | Coding, Non-Synon. | ACC=Thr         | AAC=Asn       |
|             |       |        |           |                           | MB21D1_Exon2   | 125                | C         | A             | rs610913     | SNP           | Coding, Synon.     | CCT=Pro         | CCC=Pro       |
| SW480       | 50    | male   | Caucasian | Dukes' type B             | MB21D1_Exon5_2 | 70                 | G         | A             | rs311678     | SNP           | Coding, Non-Synon. | CCT=Pro         | CAT=His       |
|             |       |        |           |                           | MB21D1_Exon1_1 | 243                | C         | A             | rs9352000    | SNP           | Coding, Synon.     | AAG=Lys         | AAA=Lys       |
|             |       |        |           |                           | MB21D1_Exon1_3 | 11                 | T         | C             | rs9446904    | SNP           | Coding, Non-Synon. | ACC=Thr         | AAC=Asn       |
|             |       |        |           |                           | MB21D1_Exon2   | 125                | C         | A             | rs610913     | SNP           | Coding, Synon.     | CCT=Pro         | CCC=Pro       |
| SW948       | 81    | female | Caucasian | Dukes' type C, grade III  | MB21D1_Exon1_1 | 243                | C         | A             | rs9352000    | SNP           | Coding, Non-Synon. | ACC=Thr         | AAC=Asn       |
|             |       |        |           |                           | MB21D1_Exon1_3 | 11                 | T         | C             | rs9446904    | SNP           | Coding, Synon.     | CCT=Pro         | CCC=Pro       |
|             |       |        |           |                           | MB21D1_Exon2   | 125                | C         | M             | rs610913     | SNP           | Coding, Non-Synon. | CCT=Pro         | CAT=His       |
|             |       |        |           |                           | MB21D1_Exon5_2 | 70                 | G         | A             | rs311678     | SNP           | Coding, Synon.     | AAG=Lys         | AAA=Lys       |
| SW1417      | 53    | female | Caucasian | Dukes' type C, grade III  | MB21D1_Exon1_1 | 243                | C         | A             | rs9352000    | SNP           | Coding, Non-Synon. | ACC=Thr         | AAC=Asn       |
|             |       |        |           |                           | MB21D1_Exon1_3 | 11                 | T         | C             | rs9446904    | SNP           | Coding, Synon.     | ACC=Thr         | AAC=Asn       |
|             |       |        |           |                           | MB21D1_Exon2   | 125                | C         | A             | rs610913     | SNP           | Coding, Non-Synon. | CCT=Pro         | CAT=His       |
|             |       |        |           |                           | MB21D1_Exon5_2 | 70                 | G         | A             | rs311678     | SNP           | Coding, Synon.     | CCT=Pro         | CAT=His       |
| LOVO        | 56    | male   |           | Dukes' type C, grade IV   | MB21D1_Exon1_1 | 33                 | T         | HD            | rs34413328   | Deletion      | UTR                |                 |               |
|             |       |        |           |                           | MB21D1_Exon1_1 | 243                | C         | M             | rs9352000    | SNP           | Coding, Non-Synon. | AAG=Lys         | AAA=Lys       |
|             |       |        |           |                           | MB21D1_Exon1_3 | 11                 | T         | Y             | rs9446904    | SNP           | Coding, Synon.     | ACC=Thr         | AAC=Asn       |
|             |       |        |           |                           | MB21D1_Exon2   | 125                | C         | M             | rs610913     | SNP           | Coding, Non-Synon. | CCT=Pro         | CCC=Pro       |
| SW48        | 82    | female | Caucasian | Dukes' type C, grade IV   | MB21D1_Exon5_2 | 70                 | G         | R             | rs311678     | SNP           | Coding, Synon.     | AAG=Lys         | AAA=Lys       |
|             |       |        |           |                           | MB21D1_Exon1_1 | 33                 | T         | HD            | rs34413328   | Deletion      | UTR                |                 |               |
|             |       |        |           |                           | MB21D1_Exon1_1 | 243                | C         | M             | rs9352000    | SNP           | Coding, Non-Synon. | ACC=Thr         | AAC=Asn       |
|             |       |        |           |                           | MB21D1_Exon2   | 125                | C         | A             | rs610913     | SNP           | Coding, Synon.     | AAG=Lys         | AAA=Lys       |
| HT29        | 44    | female | Caucasian | colorectal adenocarcinoma | MB21D1_Exon1_1 | 243                | C         | M             | rs9352000    | SNP           | Coding, Non-Synon. | ACC=Thr         | AAC=Asn       |
|             |       |        |           |                           | MB21D1_Exon1_1 | 33                 | T         | HD            | rs34413328   | Deletion      | UTR                |                 |               |
|             |       |        |           |                           | MB21D1_Exon1_1 | 243                | C         | A             | rs9352000    | SNP           | Coding, Non-Synon. | ACC=Thr         | AAC=Asn       |
|             |       |        |           |                           | MB21D1_Exon1_3 | 11                 | T         | C             | rs9446904    | SNP           | Coding, Synon.     | CCT=Pro         | CCC=Pro       |
| HT116       | adult | male   |           | colorectal carcinoma      | MB21D1_Exon2   | 125                | C         | M             | rs610913     | SNP           | Coding, Non-Synon. | CCT=Pro         | CAT=His       |
|             |       |        |           |                           | MB21D1_Exon4   | 15                 | C         | S             | Novel        | SNP           | Coding, Non-Synon. | CCT=Pro         | CAT=His       |
|             |       |        |           |                           | MB21D1_Exon5_2 | 70                 | G         | R             | rs311678     | SNP           | Coding, Non-Synon. | CTA=Leu         | GTA=Val       |
|             |       |        |           |                           | MB21D1_Exon1_1 | 243                | C         | A             | rs9352000    | SNP           | Coding, Synon.     | AAG=Lys         | AAA=Lys       |
| Colo205     | 70    | male   | Caucasian | Dukes' type D             | MB21D1_Exon1_1 | 243                | C         | A             | rs9352000    | SNP           | Coding, Non-Synon. | ACC=Thr         | AAC=Asn       |
|             |       |        |           |                           | MB21D1_Exon1_3 | 11                 | T         | C             | rs9446904    | SNP           | Coding, Synon.     | CCT=Pro         | CCC=Pro       |
|             |       |        |           |                           | MB21D1_Exon2   | 125                | C         | A             | rs610913     | SNP           | Coding, Non-Synon. | CCT=Pro         | CAT=His       |
|             |       |        |           |                           | MB21D1_Exon5_2 | 70                 | G         | A             | rs311678     | SNP           | Coding, Synon.     | AAG=Lys         | AAA=Lys       |

Table S3, related to Figure 6. IHC analysis of STING and cGAS in Colon Cancer Tissue Microarray

| Type         | Stage | Position | Age    | Sex                        | Diagnose                            | STING |           |         |        | cGAS |           |         |        |
|--------------|-------|----------|--------|----------------------------|-------------------------------------|-------|-----------|---------|--------|------|-----------|---------|--------|
|              |       |          |        |                            |                                     | Area  | Intensity | H-Score | Status | Area | Intensity | H-Score | Status |
| Tumor        | I     | E5       | 59     | Female                     | Adenocarcinoma of colon             | 3     | 3         | 9       | +      | 3    | 3         | 9       | +      |
|              | IIA   | B2       | 68     | Male                       | Adenocarcinoma of colon             | 3     | 2         | 6       | +      | 3    | 2         | 6       | +      |
|              | IIA   | C2       | 69     | Female                     | Adenocarcinoma of colon, mucinous   | 3     | 2         | 6       | +      | 0    | 0         | 0       | -      |
|              | IIA   | C4       | 66     | Male                       | Adenocarcinoma of colon             | 3     | 3         | 9       | +      | 0    | 0         | 0       | -      |
|              | IIA   | D1       | 75     | Male                       | Adenocarcinoma of rectum            | 3     | 3         | 9       | +      | 0    | 0         | 0       | -      |
|              | IIA   | D5       | 83     | Female                     | Adenocarcinoma of colon             | 3     | 2         | 6       | +      | 3    | 1         | 3       | +      |
|              | IIA   | F4       | 57     | Female                     | Adenocarcinoma of colon             | 2     | 3         | 6       | +      | 1    | 2         | 2       | -      |
|              | IIA   | H3       | 70     | Female                     | Adenocarcinoma of colon             | 3     | 3         | 9       | +      | 3    | 2         | 6       | +      |
|              | IIB   | G5       | 58     | Female                     | Adenocarcinoma of colon             | 3     | 2         | 6       | +      | 3    | 3         | 9       | +      |
|              | IIB   | H5       | 75     | Male                       | Adenocarcinoma of colon             | 3     | 2         | 6       | +      | 0    | 0         | 0       | -      |
|              | IIIA  | H1       | 71     | Female                     | Adenocarcinoma of colon, metastatic | 3     | 2         | 6       | +      | 3    | 2         | 6       | +      |
|              | IIIB  | B1       | 79     | Male                       | Adenocarcinoma of colon             | 1     | 1         | 1       | -      | 3    | 2         | 6       | +      |
|              | IIIB  | C5       | 42     | Female                     | Adenocarcinoma of colon             | 3     | 2         | 6       | +      | 3    | 3         | 9       | +      |
|              | IIIB  | E2       | 50     | Male                       | Adenocarcinoma of colon             | 3     | 3         | 9       | +      | 0    | 0         | 0       | -      |
|              | IIIB  | F1       | 60     | Female                     | Adenocarcinoma of colon             | 3     | 3         | 9       | +      | 0    | 0         | 0       | -      |
|              | IIIB  | F5       | 78     | Male                       | Adenocarcinoma of colon, mucinous   | 1     | 2         | 2       | -      | 1    | 2         | 2       | -      |
|              | IIIB  | G4       | 89     | Female                     | Adenocarcinoma of colon             | 3     | 3         | 9       | +      | 3    | 3         | 9       | +      |
|              | IIIC  | C1       | 55     | Female                     | Adenocarcinoma of colon             | 2     | 1         | 2       | -      | 3    | 1         | 3       | +      |
|              | IIIC  | D3       | 38     | Male                       | Adenocarcinoma of colon             | 3     | 3         | 9       | +      | 0    | 0         | 0       | -      |
|              | IIIC  | F2       | 45     | Male                       | Adenocarcinoma of colon             | 3     | 3         | 9       | +      | 3    | 3         | 9       | +      |
|              | IIIC  | G1       | 64     | Male                       | Adenocarcinoma of colon             | 3     | 3         | 9       | +      | 3    | 3         | 9       | +      |
|              | IIIC  | G2       | 76     | Female                     | Adenocarcinoma of colon             | 3     | 2         | 6       | +      | 1    | 1         | 1       | -      |
|              | IIIC  | G3       | 56     | Male                       | Adenocarcinoma of colon, mucinous   | 3     | 3         | 9       | +      | 2    | 1         | 2       | -      |
|              | IIIC  | H4       | 60     | Female                     | Adenocarcinoma of colon             | 1     | 2         | 2       | -      | 2    | 3         | 6       | +      |
|              | IV    | A1       | 72     | Male                       | Adenocarcinoma of colon, metastatic | 1     | 1         | 1       | -      | 0    | 0         | 0       | -      |
|              | IV    | A3       | 36     | Male                       | Adenocarcinoma of colon             | 3     | 2         | 6       | +      | 2    | 1         | 2       | -      |
|              | IV    | A4       | 57     | Female                     | Adenocarcinoma of colon, metastatic | 2     | 3         | 6       | +      | 0    | 0         | 0       | -      |
|              | IV    | A5       | 66     | Female                     | Adenocarcinoma of colon, metastatic | 2     | 3         | 6       | +      | 3    | 2         | 6       | +      |
|              | IV    | B3       | 77     | Male                       | Adenocarcinoma of colon, metastatic | 3     | 2         | 6       | +      | 0    | 0         | 0       | -      |
|              | IV    | B4       | 70     | Male                       | Adenocarcinoma of colon, metastatic | 3     | 2         | 6       | +      | 3    | 2         | 6       | +      |
|              | IV    | B5       | 49     | Female                     | Adenocarcinoma of colon, metastatic | 3     | 2         | 6       | +      | 3    | 3         | 9       | +      |
|              | IV    | D2       | 72     | Male                       | Adenocarcinoma of colon             | 3     | 3         | 9       | +      | 3    | 3         | 9       | +      |
| IV           | D4    | 64       | Male   | Adenocarcinoma, metastatic | 2                                   | 3     | 6         | +       | 0      | 0    | 0         | -       |        |
| Not Reported | A2    |          |        | Adenocarcinoma of colon    | 2                                   | 1     | 2         | -       | 3      | 3    | 9         | +       |        |
| Not Reported | E1    |          |        | Adenocarcinoma of colon    | 3                                   | 3     | 9         | +       | 3      | 2    | 6         | +       |        |
| Not Reported | E3    |          |        | Adenocarcinoma of colon    | 2                                   | 3     | 6         | +       | 3      | 2    | 6         | +       |        |
| Not Reported | E4    |          |        | Adenocarcinoma of colon    | 2                                   | 3     | 6         | +       | 3      | 2    | 6         | +       |        |
| Not Reported | F3    |          |        | Adenocarcinoma of colon    | 3                                   | 3     | 9         | +       | 2      | 2    | 4         | +       |        |
| Not Reported | H2    |          |        | Adenocarcinoma of colon    | 3                                   | 3     | 9         | +       | 0      | 0    | 0         | -       |        |
| Normal       | I1    | 71       | Female | Within normal limits       | 3                                   | 3     | 9         | +       | 3      | 2    | 6         | +       |        |
|              | I3    | 70       | Female | Within normal limits       | 3                                   | 3     | 9         | +       | 3      | 3    | 9         | +       |        |
|              | I5    | 75       | Male   | Within normal limits       | 3                                   | 2     | 6         | +       | 3      | 2    | 6         | +       |        |
|              | I4    | 60       | Female | Within normal limits       | 3                                   | 2     | 6         | +       | 3      | 2    | 6         | +       |        |
|              | J1    | 43       | Female | Within normal limits       | 3                                   | 3     | 9         | +       | 3      | 3    | 9         | +       |        |
|              | J2    | 71       | Female | Within normal limits       | 3                                   | 3     | 9         | +       | 3      | 2    | 6         | +       |        |
|              | J4    | 47       | Male   | Within normal limits       | 3                                   | 3     | 9         | +       | 3      | 3    | 9         | +       |        |
|              | J5    | 31       | Female | Within normal limits       | 3                                   | 3     | 9         | +       | 3      | 2    | 6         | +       |        |

Statistical analysis of STING/cGAS expression in TMA-IHC

| STAGE        | STING expression |         | cGAS expression |          |
|--------------|------------------|---------|-----------------|----------|
|              | H-Score          | p-value | H-Score         | p-value  |
| Normal       | 8.25±1.4 (n=8)   | N/A     | 7.1±1.6 (n=8)   | N/A      |
| I            | 9 (n=1)          | N/A     | 9 (n=1)         | N/A      |
| II           | 7±1.5 (n=9)      | 0.096   | 2.9±3.4 (n=9)   | 0.005*** |
| III          | 6.3±3.2 (n=14)   | 0.119   | 4.4±3.7 (n=14)  | 0.064    |
| IV           | 5.8±2.0 (n=9)    | 0.012*  | 3.6±3.9 (n=9)   | 0.030*   |
| Unkown Stage | 6.8±2.8 (n=6)    | 0.233   | 5.2±3 (n=6)     | 0.136    |
